# Supplementary material for: Insights into the Structure of the Vip3Aa Insecticidal Protein by Protease Digestion Analysis
Source: PubMed Central journal article supplement (PMC5408205; doi:10.3390/toxins9040131), 2017-04-07
Supplement: toxins-09-00131-s001.pdf [file toxins-09-00131-s001.pdf]

# Supplementary Materials: Insights into the Structure of the Vip3Aa Insecticidal Protein by Protease Digestion Analysis

Yolanda Bel, Núria Banyuls, Maissa Chakroun, Baltasar Escriche, Juan Ferré\*

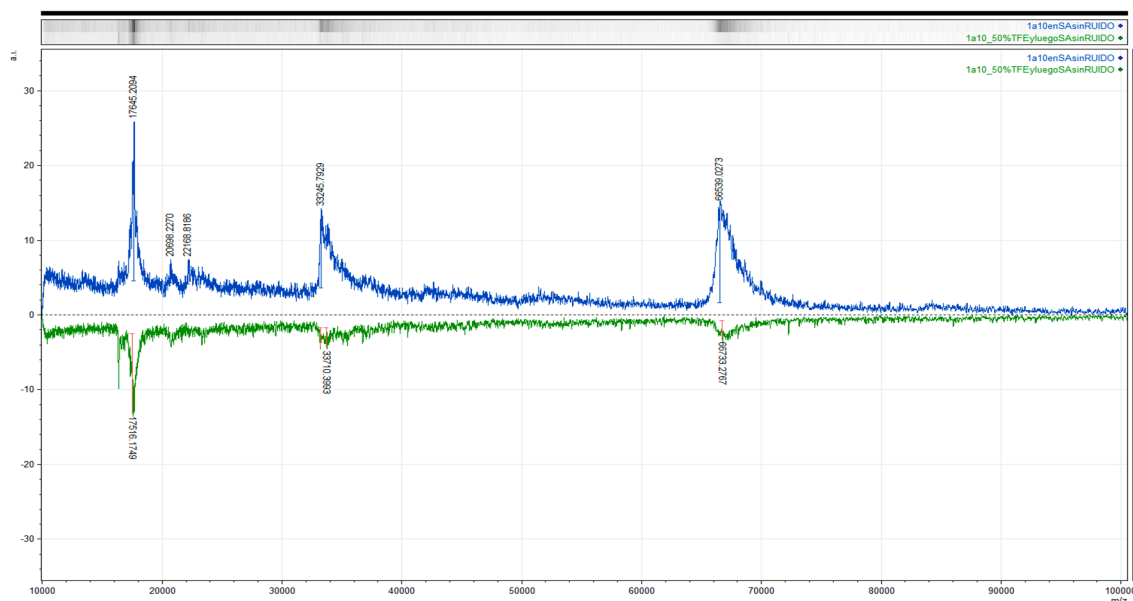

**Figure S1.** Molecular mass determination by MALDI TOF/TOF of the 66 kDa polypeptide formed after treatment of the Vip3Aa protoxin with trypsin (24:100 trypsin:Vip3A, w:w) for 3 days.
